# Supplementary material
Source: PubMed Central journal article supplement (PMC5927981)
Supplement: 2017_171876-Disclosures_and_Contributions.pdf [file 2017_171876-Disclosures_and_Contributions.pdf]

Haematologica  
HAEMATOL/2017/171876  
Version 4

Clonal evolution in the transition from cutaneous disease to acute leukaemia suggested by liquid biopsy in blastic plasmacytoid dendritic cell neoplasm

Eleni Ladikou, Barbara Ottolini, Nadia Nawaz, Rebecca L. Allchin, Daniel Payne, Hebah Ali, Teresa Marafioti, Jacqui Shaw, Matthew J. Ahearne, and Simon D. Wagner

Disclosures: None

Contributions: EL, BO, DP, NN and RLA performed research and data analysis. HA and TM provided essential reagents and critiqued the manuscript. JS provided essential equipment and critiqued the manuscript. MJA and SDW designed experiments and wrote the manuscript.
